# Supplementary material for: Environmental responsiveness of flowering time in cassava genotypes and associated transcriptome changes
Source: PLoS One. 2021 Jul 21;16(7):e0253555. doi: 10.1371/journal.pone.0253555 (PMC8294508; doi:10.1371/journal.pone.0253555)
Supplement: S3 Table — Arabidopsis homologs of cassava differentially expressed genes were compared to the Arabidopsis thaliana expression database using ShinyGO [38]. (XLSX) [file pone.0253555.s009.xlsx]

## Sheet: down in Ubiaja
Enrichment FDR	Genes in list	Total genes	Functional Category	Genes
7.05854e-15	54	633	External encapsulating structure organization	AT1G04430 AT1G26850 AT1G78240 AT2G03480 AT2G34300 AT3G62060 AT4G19120 AT4G19410 AT5G23870 AT5G60920 AT3G61130 AT5G15740 AT1G10550 AT1G11545 AT1G19300 AT1G30620 AT1G53840 AT1G75500 AT1G78570 AT2G22125 AT2G27500 AT2G44500 AT3G01040 AT3G03050 AT3G14310 AT3G23730 AT3G25140 AT3G26370 AT3G49720 AT3G50760 AT3G62660 AT4G07960 AT4G20170 AT4G28850 AT4G31590 AT4G32410 AT4G33220 AT5G05170 AT5G20860 AT5G47820…
2.71389e-14	51	596	Cell wall organization	AT1G04430 AT1G26850 AT1G78240 AT2G03480 AT2G34300 AT3G62060 AT4G19120 AT4G19410 AT5G23870 AT5G60920 AT3G61130 AT5G15740 AT1G10550 AT1G11545 AT1G19300 AT1G53840 AT1G75500 AT1G78570 AT2G22125 AT2G27500 AT2G44500 AT3G01040 AT3G03050 AT3G14310 AT3G23730 AT3G25140 AT3G26370 AT3G49720 AT3G50760 AT3G62660 AT4G07960 AT4G20170 AT4G28850 AT4G31590 AT4G32410 AT4G33220 AT5G05170 AT5G20860 AT5G47820 AT5G49720…
1.23582e-13	57	765	Cell wall organization or biogenesis	AT1G04430 AT1G26850 AT1G78060 AT1G78240 AT2G03480 AT2G34300 AT3G03050 AT3G62060 AT4G19120 AT4G19410 AT4G32410 AT5G05170 AT5G23870 AT5G60920 AT5G64570 AT5G64740 AT3G61130 AT5G15740 AT1G10550 AT1G11545 AT1G19300 AT1G53840 AT1G75500 AT1G78570 AT2G22125 AT2G27500 AT2G44500 AT3G01040 AT3G14310 AT3G23730 AT3G25140 AT3G26370 AT3G49720 AT3G50760 AT3G62660 AT4G07960 AT4G20170 AT4G28850 AT4G31590 AT4G33220…
1.25007e-12	94	1853	Response to hormone	AT1G05010 AT1G30135 AT1G67030 AT2G17290 AT2G38310 AT2G40330 AT3G02110 AT3G04530 AT3G22960 AT4G17870 AT4G21200 AT5G08520 AT5G13220 AT5G24430 AT1G10940 AT1G16350 AT1G21270 AT1G59870 AT1G75750 AT1G77690 AT3G22890 AT3G46740 AT3G47520 AT4G01850 AT4G35100 AT4G35630 AT4G37260 AT5G20630 AT5G53460 AT5G67300 AT1G19220 AT1G25560 AT1G62300 AT1G62660 AT1G72430 AT1G75080 AT1G75500 AT2G01830 AT2G25490 AT2G33710…
1.8304e-12	71	1195	Carbohydrate metabolic process	AT1G04430 AT1G23870 AT1G26810 AT1G26850 AT1G50460 AT1G78060 AT1G78240 AT2G03480 AT2G34300 AT3G22960 AT3G57520 AT4G19120 AT4G32410 AT5G05170 AT5G20250 AT5G60920 AT5G64570 AT5G64740 AT5G65140 AT3G61130 AT4G26270 AT5G13110 AT5G15740 AT1G10550 AT1G11545 AT1G19300 AT1G30620 AT1G31420 AT1G53840 AT1G62660 AT1G76270 AT2G27500 AT2G44500 AT3G01040 AT3G02360 AT3G03050 AT3G07320 AT3G13750 AT3G13930 AT3G14310…
2.54664e-12	43	503	Polysaccharide metabolic process	AT1G04430 AT1G26810 AT1G26850 AT1G78060 AT1G78240 AT2G03480 AT2G34300 AT4G19120 AT4G32410 AT5G05170 AT5G60920 AT5G64570 AT5G64740 AT3G61130 AT5G15740 AT1G10550 AT1G11545 AT1G19300 AT1G30620 AT1G31420 AT1G53840 AT3G01040 AT3G03050 AT3G14310 AT3G23730 AT3G25140 AT3G26370 AT3G50760 AT3G62660 AT4G28850 AT4G33220 AT5G04310 AT5G20860 AT5G49720 AT5G53370 AT5G57560 AT3G49720 AT5G15490 AT5G55480 AT2G22125…
2.54664e-12	94	1888	Response to endogenous stimulus	AT1G05010 AT1G30135 AT1G67030 AT2G17290 AT2G38310 AT2G40330 AT3G02110 AT3G04530 AT3G22960 AT4G17870 AT4G21200 AT5G08520 AT5G13220 AT5G24430 AT1G10940 AT1G16350 AT1G21270 AT1G59870 AT1G75750 AT1G77690 AT3G22890 AT3G46740 AT3G47520 AT4G01850 AT4G35100 AT4G35630 AT4G37260 AT5G20630 AT5G53460 AT5G67300 AT1G19220 AT1G25560 AT1G62300 AT1G62660 AT1G72430 AT1G75080 AT1G75500 AT2G01830 AT2G25490 AT2G33710…
3.71353e-12	103	2194	Response to organic substance	AT1G05010 AT1G07530 AT1G27730 AT1G30135 AT1G67030 AT2G17290 AT2G38310 AT2G40140 AT2G40330 AT3G02110 AT3G04530 AT3G22960 AT4G17870 AT4G21200 AT5G02500 AT5G08520 AT5G13220 AT5G24360 AT5G24430 AT1G10940 AT1G16350 AT1G21270 AT1G59870 AT1G62400 AT1G75750 AT1G77690 AT3G22890 AT3G46740 AT3G47520 AT4G01850 AT4G35100 AT4G35630 AT4G37260 AT5G20630 AT5G53460 AT5G67300 AT1G19220 AT1G25560 AT1G62300 AT1G62660…
6.76513e-10	30	306	Plant-type cell wall organization or biogenesis	AT1G04430 AT1G26850 AT1G78240 AT2G03480 AT2G34300 AT3G03050 AT4G19120 AT4G32410 AT5G05170 AT5G60920 AT5G64740 AT3G61130 AT5G15740 AT3G01040 AT5G15490 AT5G55480 AT1G10550 AT1G30620 AT1G31420 AT1G75500 AT2G22125 AT3G25140 AT3G26370 AT3G49720 AT4G00730 AT4G12350 AT5G06700 AT5G16600 AT5G47820 AT5G57560
1.5412e-09	22	168	Plant-type cell wall organization	AT1G04430 AT1G26850 AT1G78240 AT2G03480 AT2G34300 AT4G19120 AT5G60920 AT3G61130 AT5G15740 AT3G01040 AT5G15490 AT5G55480 AT1G10550 AT1G31420 AT2G22125 AT3G25140 AT3G26370 AT3G49720 AT4G00730 AT5G06700 AT5G47820 AT5G57560

## Sheet: Up in Ubiaja
Enrichment FDR	Genes in list	Total genes	Functional Category	Genes
9.50086e-05	54	2150	Response to abiotic stimulus	AT1G07400 AT4G00430 AT5G24550 AT5G58770 AT5G60660 AT1G52690 AT1G68830 AT1G73805 AT2G47900 AT1G65480 AT2G16365 AT2G32950 AT3G44450 AT1G11910 AT1G15950 AT1G16880 AT1G49010 AT1G61660 AT1G70170 AT1G72650 AT1G74840 AT1G78080 AT1G78290 AT2G21970 AT2G39980 AT2G40340 AT2G45400 AT3G04720 AT3G50930 AT3G56400 AT3G56710 AT4G01970 AT4G04330 AT4G15920 AT4G17090 AT4G30380 AT4G34000 AT4G37930 AT5G20230 AT5G24090…
9.50086e-05	33	995	Response to inorganic substance	AT1G07400 AT1G32450 AT2G37330 AT4G00430 AT5G53550 AT5G60660 AT1G52690 AT1G67940 AT1G49010 AT1G60420 AT1G61660 AT1G70170 AT1G72650 AT1G74840 AT1G78080 AT2G47900 AT3G16640 AT3G48000 AT4G04330 AT4G31940 AT4G34000 AT4G37930 AT4G38220 AT5G16970 AT5G24090 AT5G50720 AT5G55620 AT5G59320 AT1G52340 AT3G05500 AT3G05700 AT3G12490 AT3G56400
0.00134	45	1835	Oxidation-reduction process	AT1G01580 AT1G50940 AT4G14430 AT5G14400 AT5G50160 AT5G58800 AT1G03630 AT1G08570 AT1G15950 AT1G18730 AT1G52340 AT1G53670 AT1G60420 AT1G60690 AT1G64940 AT1G68540 AT2G02390 AT2G22780 AT2G36690 AT2G45400 AT3G03080 AT3G14690 AT3G19000 AT3G26300 AT3G44880 AT3G48000 AT3G48280 AT3G51680 AT3G54900 AT4G00570 AT4G12320 AT4G25570 AT4G31940 AT4G36220 AT5G05340 AT5G09970 AT5G13700 AT5G16970 AT5G20230 AT5G24910…
0.00181959	66	3194	Response to chemical	AT1G07400 AT1G32450 AT1G49010 AT1G50420 AT1G53670 AT2G34960 AT2G37330 AT3G21510 AT3G58720 AT4G00430 AT4G37930 AT5G16530 AT5G53550 AT5G60660 AT1G11910 AT1G16880 AT1G21410 AT1G52690 AT1G73805 AT1G73980 AT3G16640 AT3G56400 AT4G34000 AT1G67940 AT1G78080 AT2G02390 AT2G22660 AT2G40340 AT3G50740 AT3G55830 AT5G05340 AT5G41210 AT5G60450 AT5G65670 AT1G28330 AT1G60420 AT1G61660 AT1G70170 AT1G72650 AT1G74840…
0.00224386	7	66	Cellular transition metal ion homeostasis	AT1G01580 AT4G22220 AT5G50160 AT3G15353 AT5G53550 AT4G37270 AT3G09390
0.00238187	16	381	Response to water deprivation	AT4G00430 AT5G60660 AT1G52690 AT1G61660 AT1G78080 AT4G04330 AT4G34000 AT5G24090 AT5G50720 AT5G59320 AT1G52340 AT3G05500 AT3G05700 AT3G12490 AT3G16640 AT3G56400
0.00262709	16	389	Response to water	AT4G00430 AT5G60660 AT1G52690 AT1G61660 AT1G78080 AT4G04330 AT4G34000 AT5G24090 AT5G50720 AT5G59320 AT1G52340 AT3G05500 AT3G05700 AT3G12490 AT3G16640 AT3G56400
0.00291309	71	3648	Response to stress	AT1G07400 AT1G23260 AT1G53670 AT1G64750 AT1G68020 AT3G58720 AT4G00430 AT4G12740 AT4G29050 AT5G24550 AT5G58770 AT5G60660 AT1G07390 AT1G52690 AT2G47900 AT3G04720 AT3G21630 AT5G48380 AT1G24020 AT1G73805 AT1G73980 AT1G80600 AT2G14580 AT2G39940 AT3G12490 AT3G50930 AT3G56400 AT3G56710 AT5G05340 AT5G21090 AT5G56460 AT1G11910 AT1G15950 AT1G16880 AT1G49010 AT1G61660 AT1G70170 AT1G72650 AT1G74840 AT1G78080…
0.00751029	21	682	Response to osmotic stress	AT1G07400 AT5G24550 AT2G47900 AT1G11910 AT1G49010 AT1G61660 AT1G70170 AT1G72650 AT1G74840 AT1G78080 AT3G04720 AT3G56400 AT4G04330 AT4G34000 AT5G24090 AT5G50720 AT1G78290 AT2G22660 AT2G41130 AT3G05700 AT3G12490
0.00751029	3	8	Regulation of lignin biosynthetic process	AT5G05340 AT5G20230 AT5G49660
